# Supplementary material for: Tumor Heterogeneity Underlies Differential Cisplatin Sensitivity in Mouse Models of Small-Cell Lung Cancer
Source: PubMed Central journal article supplement (PMC6581744; doi:10.1016/j.celrep.2019.05.057), 2019-06-11
Supplement: mmc1.pdf [file mmc1.pdf]

**Cell Reports, Volume 27**

## **Supplemental Information**

**Tumor Heterogeneity Underlies**

**Differential Cisplatin Sensitivity**

**in Mouse Models of Small-Cell Lung Cancer**

**Franziska Böttger, Ekaterina A. Semenova, Ji-Ying Song, Giustina Ferone, Jan van der Vliet, Miranda Cozijnsen, Rajith Bhaskaran, Lorenzo Bombardelli, Sander R. Piersma, Thang V. Pham, Connie R. Jimenez, and Anton Berns**

## Figure S1. Related to Figures 1 and 2

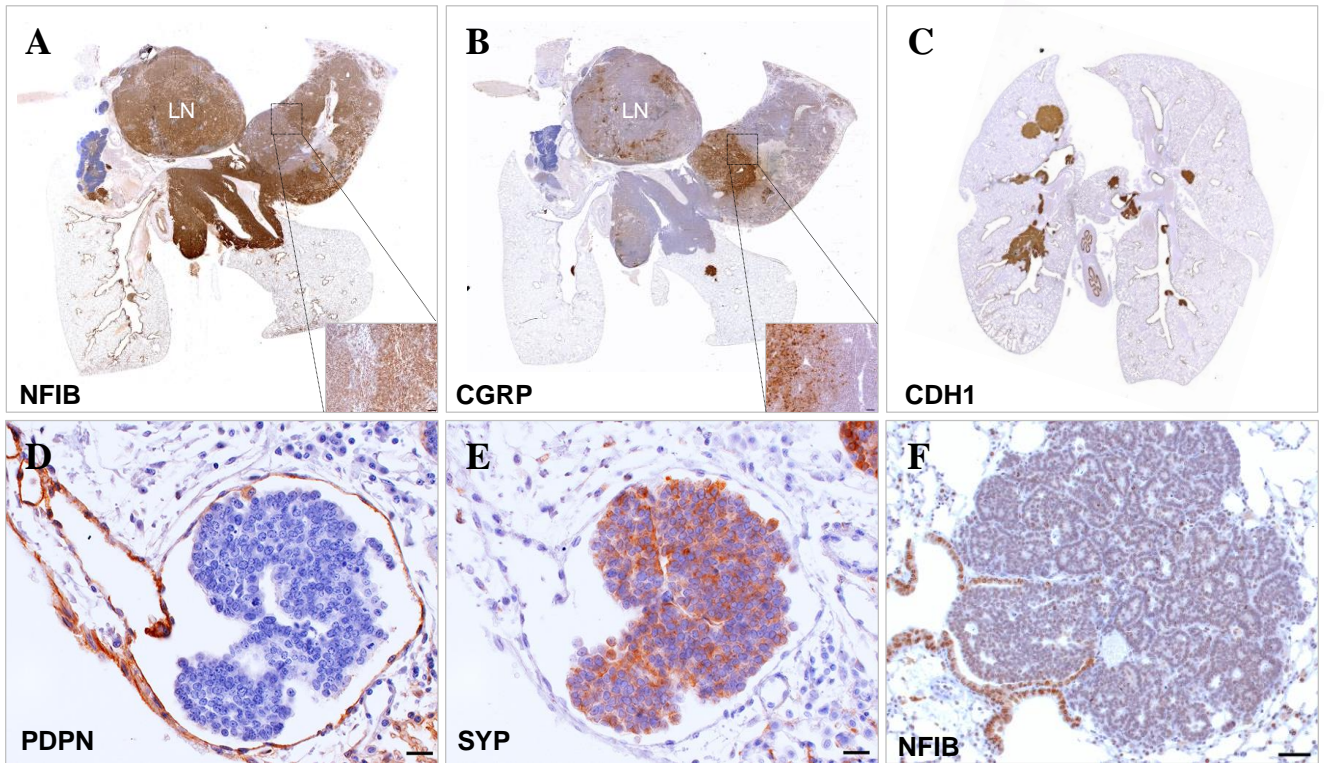

### Figure S1. Related to Figures 1 and 2.

(A), (B) NFIB and CGRP staining of the lung of RP mouse, respectively. Inset shows an area of the central tumor with two tumor populations in close proximity, scale bar 50  $\mu\text{m}$ . (C) CDH1 staining of a representative lung of a tumor bearing mouse taken at an early time point (14 weeks) after tumor induction showing positive signal for all primary lesions. (D), (E) Podoplanin and synaptophysin staining respectively, showing NE cells within a lymph vessel. (F) NFIB staining of an alveolar lesion. Scale bar for (D), (E), 20  $\mu\text{m}$ . Scale bar for (F), 50  $\mu\text{m}$ .

## Figure S2. Related to Figure 3

**A**

|                     | ASCL-1 | NEUROD-1           | NFIB          | p-AKT | p-4EBP1 | CGRP | CDH1 |
|---------------------|--------|--------------------|---------------|-------|---------|------|------|
| <b>V-RPM mice</b>   |        |                    |               |       |         |      |      |
| 16ESE043            | 65%    | 20%                | 65%           | 15%   | 70%     | 50%  | 35%  |
| 16ESE047            | 90%    | 15%                | 5%            | 25%   | 40%     | 70%  | 70%  |
| 16ESE057            | 90%    | 20%<br>(very weak) | 15%           | 5%    | 50%     | 50%  | 90%  |
| 16IUB909            | 70%    | 10%                | 50%           | 15%   | 50%     | 50%  | 90%  |
| 17IUA054            | 85%    | 10%<br>(weak)      | 60%           | 10%   | 85%     | 30%  | 30%  |
| <b>Cis-RPM mice</b> |        |                    |               |       |         |      |      |
| 16ESE040            | 90%    | 5%                 | 5%            | 50%   | 60%     | 85%  | 95%  |
| 16ESE048            | 85%    | 20%<br>(weak)      | 30%           | 20%   | 40%     | 80%  | 95%  |
| 16ESE052            | 70%    | 5%                 | 10%           | 10%   | 35%     | 20%  | 95%  |
| 16ESE053            | 70%    | 20%<br>(weak)      | 65%           | 15%   | 40%     | 45%  | 50%  |
| 16ESE054            | 75%    | 20%                | 15%           | 35%   | 70%     | 70%  | 90%  |
| <b>V-RPF mice</b>   |        |                    |               |       |         |      |      |
| 17ESE001            | 90%    | 5%<br>(weak)       | 35%           | 20%   | 70%     | 25%  | 50%  |
| 17ESE005            | 85%    | 5%<br>(weak)       | 20%           | 10%   | 70%     | 25%  | 30%  |
| 17ESE006            | 90%    | 10%                | 20%<br>(weak) | 10%   | 85%     | 30%  | 15%  |
| 17ESE008            | 95%    | 10%                | 30%           | 15%   | 65%     | 60%  | 30%  |
| 17ESE011            | 80%    | 30%                | 50%           | 5%    | 70%     | 35%  | 40%  |
| <b>Cis-RPF mice</b> |        |                    |               |       |         |      |      |
| 17ESE002            | 85%    | 30%<br>(weak)      | 60%           | 10%   | 70%     | 45%  | 99%  |
| 17ESE003            | 80%    | 20%                | 50%           | 25%   | 50%     | 60%  | 100% |
| 17ESE007            | 90%    | 90%                | 70%           | 35%   | 75%     | 35%  | 85%  |
| 17ESE010            | 85%    | 35%                | 65%           | 10%   | 75%     | 35%  | 85%  |
| 17ESE012            | 75%    | 30%                | 40%           | 10%   | 65%     | 25%  | 85%  |

**B**

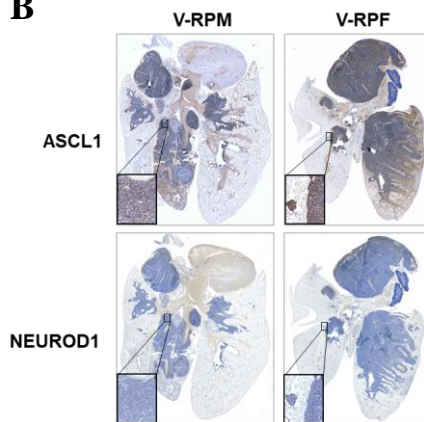

**Figure S2. Related to Figure 3.**

(A) Estimation of staining intensities of different antibodies on lungs of vehicle- and cisplatin-treated RPM and RPF mice. Staining intensities are averaged across lesion types and therefore do not reflect the expression heterogeneity seen for many of the markers (see Figure S2B). (B) Representative IHC stainings of ASCL1 and NEUROD1 in RPM and RPF lungs, respectively. Insets show nuclear staining of ASCL1 in the SCLC cells of the advanced lesions from RPM lung and of initial and advanced lesions from RPF lung, whereas the staining of NEUROD1 was largely absent (scale bar 50  $\mu$ m).

**Figure S3. Related to Figures 4 and 5**

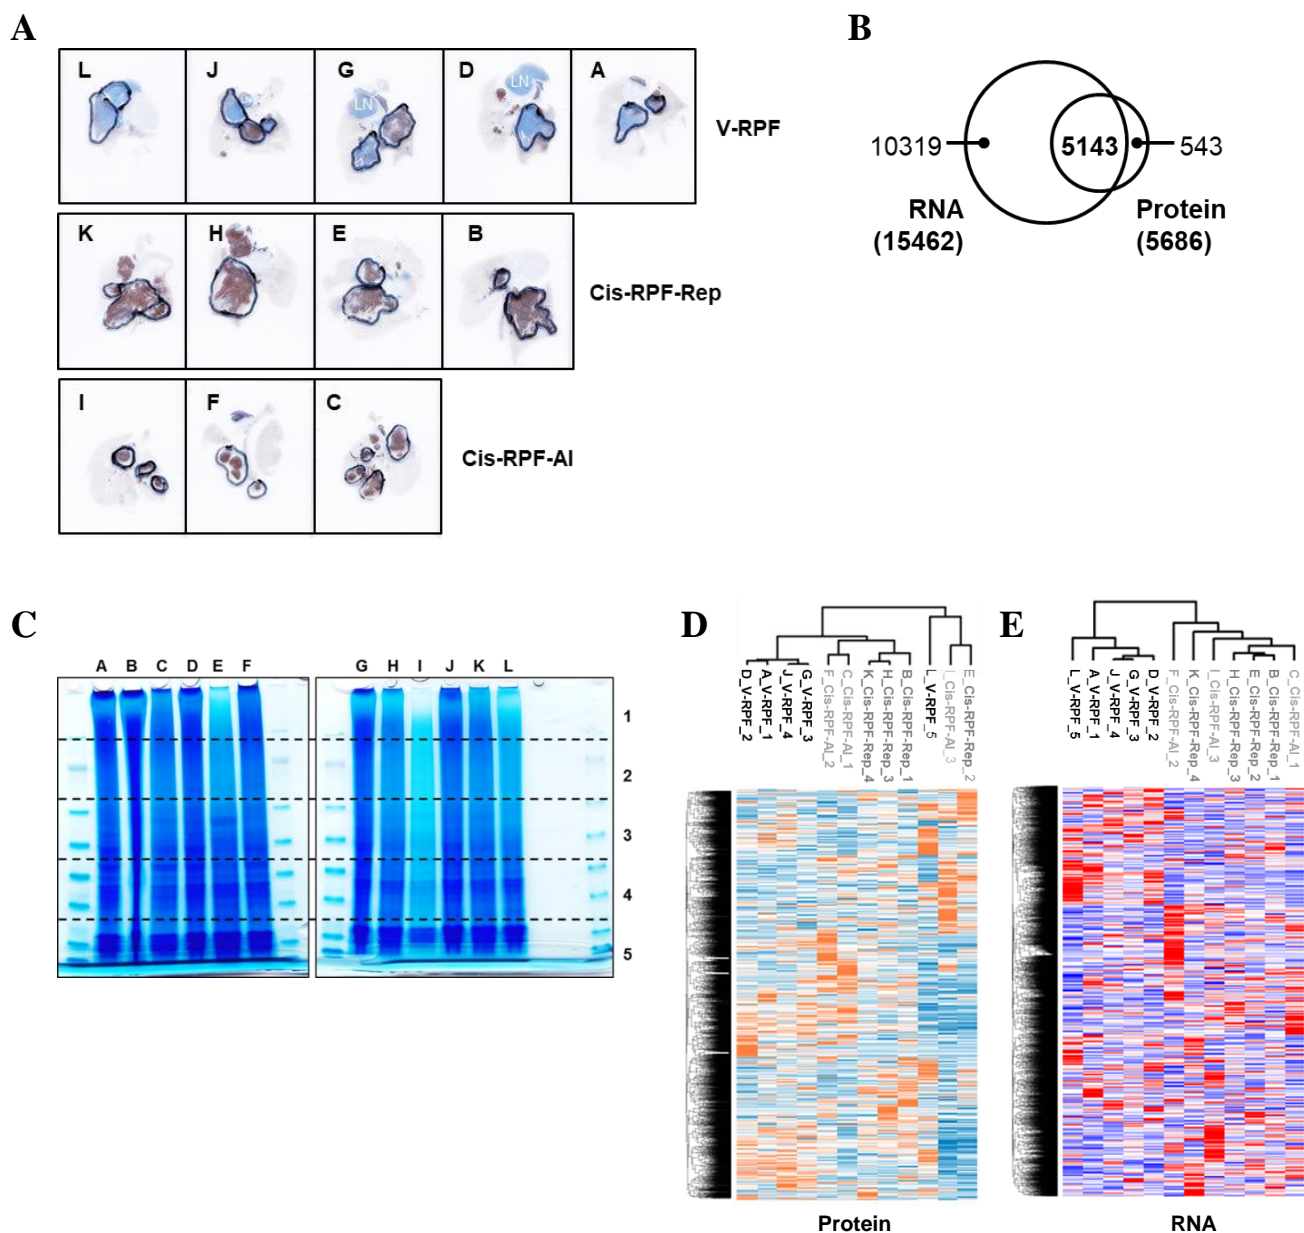

# Figure S4. Related to Figure 4

**A**

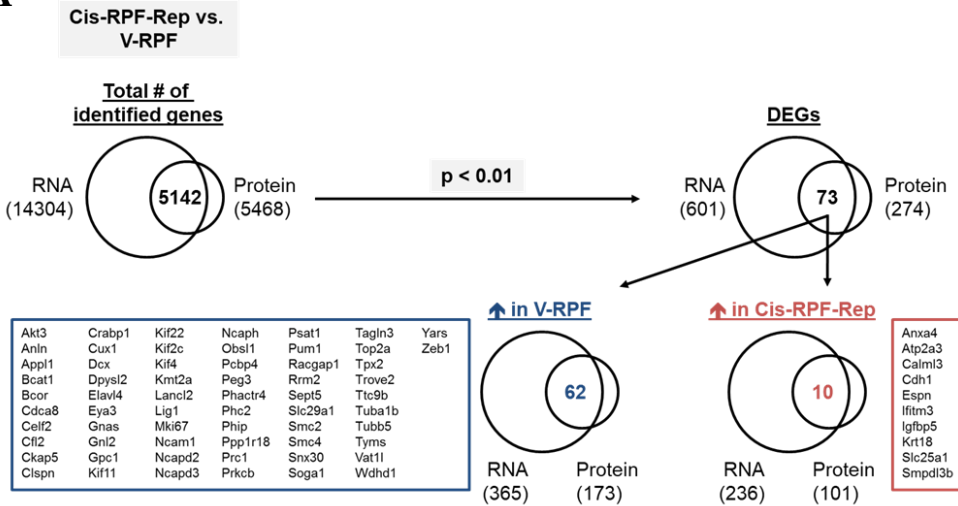

**B**

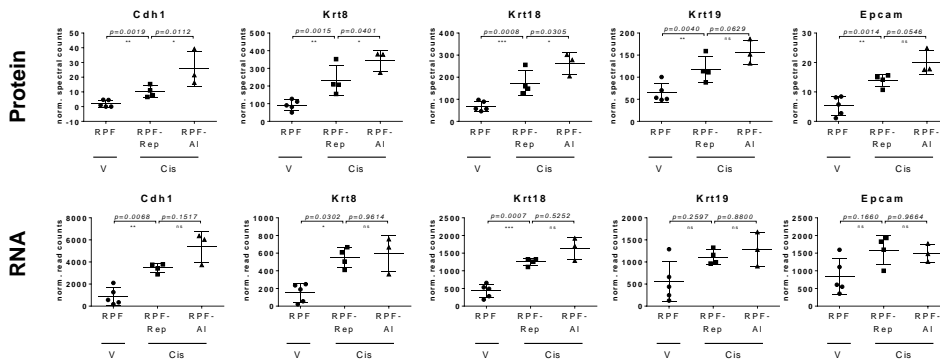

**C**

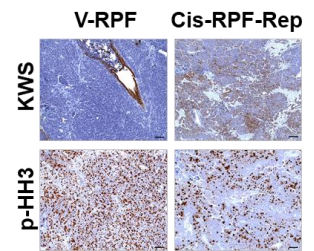

**D**

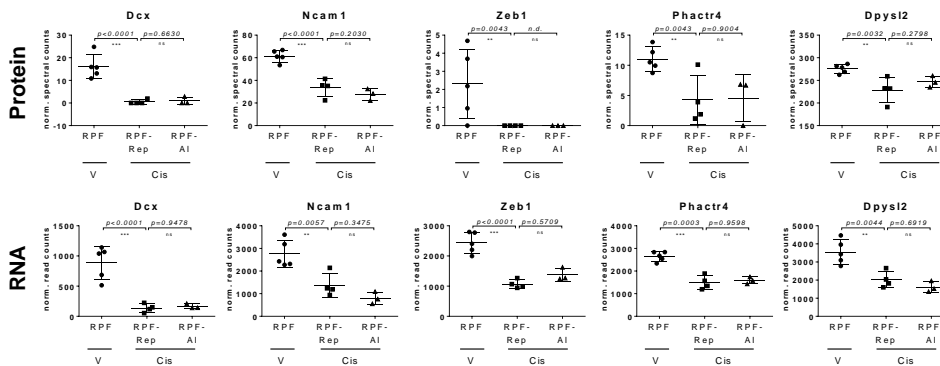

**E**

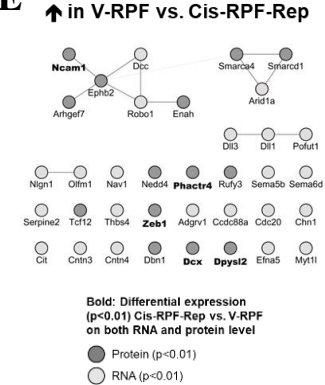

## Figure S4. Related to Figure 4.

(A) Overview statistical filtering strategy Cis-RPF-Rep vs. V-RPF comparison and overlap of genes identified in transcriptomic and proteomic analyses (differentially expressed genes determined using beta-binomial test on normalized spectral counts for protein and DESeq2 for RNA-seq data). (B) Expression plots of *Cdh1* and functionally connected epithelial marker proteins that were significantly differentially expressed on protein level ( $p$ -value  $*$   $< 0.05$ ,  $**$   $< 0.01$ ,  $***$   $< 0.001$ ). (C) Wide-spectrum keratin (KWS) and phospho-histone H3/p-HH3 (Ser10) stainings of V-RPF and Cis-RPF-Rep samples (D) Expression plots of migration-associated genes of neuronal origin that were significantly differentially expressed on both protein and RNA level. (E) Migration-associated genes of neuronal origin with highly significant ( $p < 0.01$ ) decrease in protein and/or RNA levels in Cis-RPF-Rep vs. V-RPF comparison.

**Figure S5. Related to Figure 4**

**A**

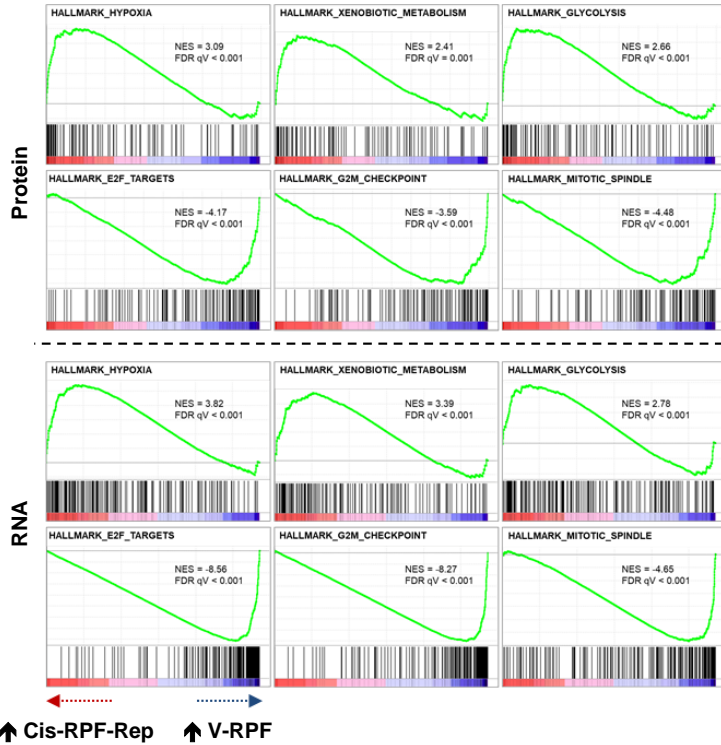

**B**

**Enriched HALLMARK gene sets Cis-RPF-Rep vs. V-RPF**

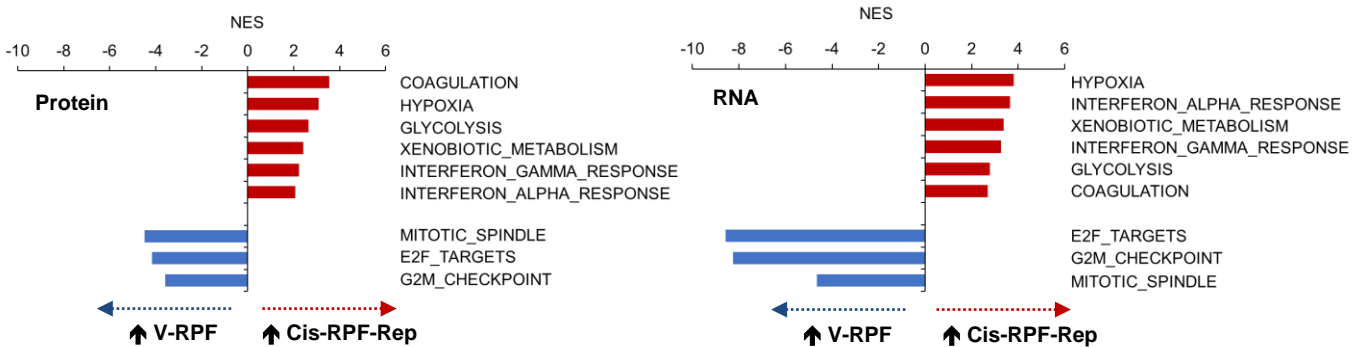

**C**

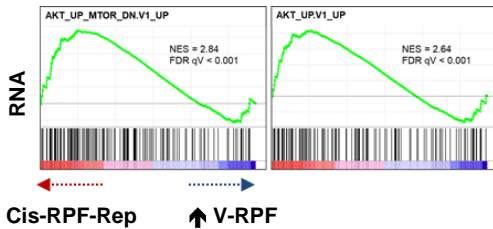

**Figure S5. Related to Figure 4.**

(A) Enrichment plots of gene sets significantly (FDR q-value<0.05, normalized enrichment score, NES ≥ 2.5) enriched on both protein and RNA level (GSEA\_HALLMARKS) in Cis-RPF-Rep vs. V-RPF comparison. (B) Gene sets significantly (FDR q-value < 0.05, normalized enrichment score, NES ≥ 2.5) enriched on both protein and RNA level in Cis-RPF-Rep vs. V-RPF comparison (GSEA\_HALLMARKS). Figure 4C shows averages (av. NES) of the separate protein and RNA NES values shown here. (C) Enrichment plots of oncogenic signature gene sets AKT\_UP\_MTOR\_DN.V1\_UP and AKT\_UP.V1\_UP enriched on RNA level in Cis-RPF-Rep vs. V-RPF comparison.

# Figure S6. Related to Figure 5

**A**

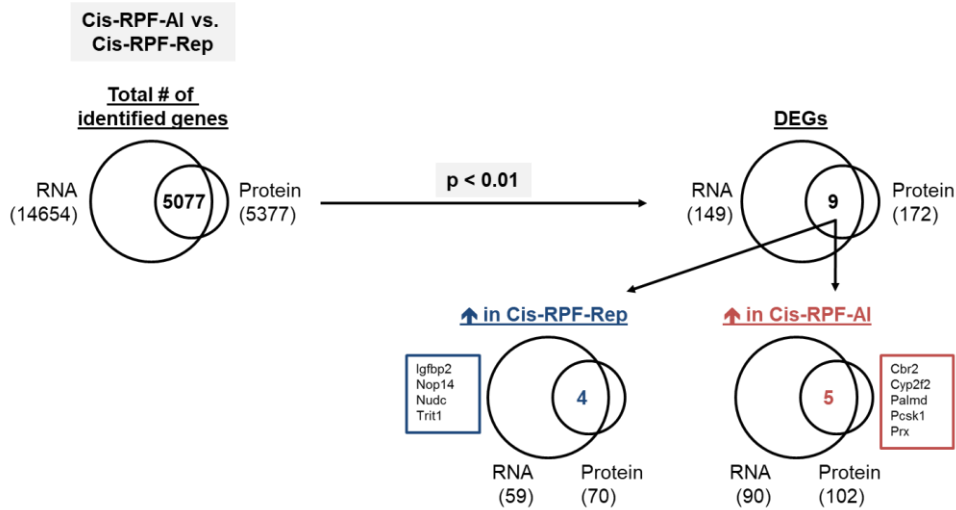

**B**

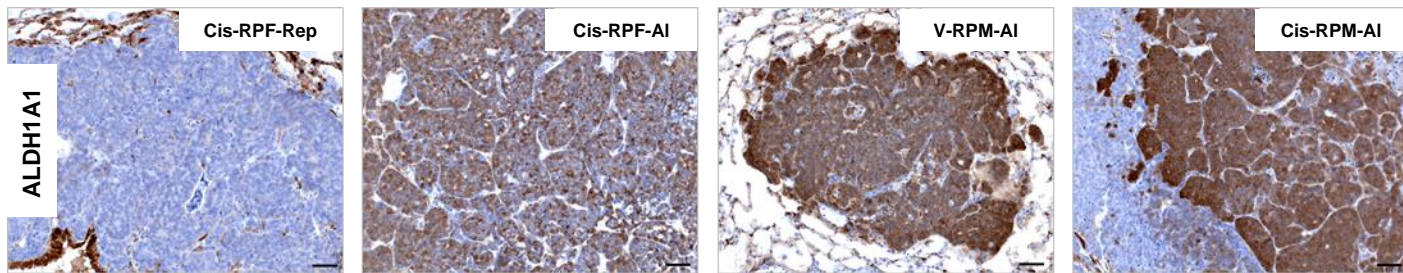

**C**

**RNA**

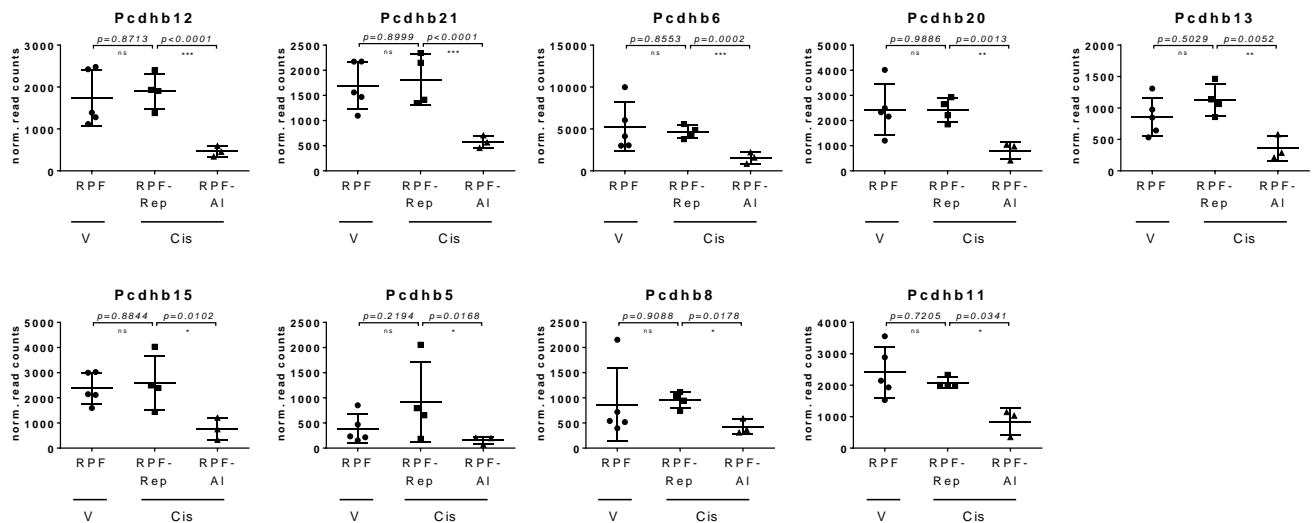

**Figure S6. Related to Figure 5.**

(A) Overview statistical filtering strategy Cis-RPF-AI vs. Cis-RPF-Rep comparison and overlap of genes identified in transcriptomic and proteomic analyses (differentially expressed genes determined using beta-binomial test on normalized spectral counts for protein and DESeq2 for RNA-seq data). (B) ALDH1A1 stainings of repopulating and alveolar populations in RPF and RPM lung samples. (C) Expression plots of significantly differentially expressed *Pcdhb* protocadherin genes ( $p$ -value \*  $< 0.05$ , \*\*  $< 0.01$ , \*\*\*  $< 0.001$ ).
